# Supplementary material for: Long-COVID-19 in Asymptomatic, Non-Hospitalized, and Hospitalized Populations: A Cross-Sectional Study
Source: MDPI journal article supplement (doi:10.3390/jcm12072613), 2023-03-30
Supplement: s1 [file s1]

## SURVEY FORM

|   |                                                                                                                                                                                 |
|---|---------------------------------------------------------------------------------------------------------------------------------------------------------------------------------|
| 1 | Gender: <b>1.</b> Male <b>2.</b> Female                                                                                                                                         |
| 2 | Age (Years): .....                                                                                                                                                              |
| 3 | Level of education: <b>1.</b> No education <b>2.</b> Primary school <b>3.</b> Secondary School<br><br><b>4.</b> High school <b>5.</b> Graduate <b>6.</b> Post-graduate          |
| 4 | What is your occupation? .....                                                                                                                                                  |
| 5 | Marital status: <b>1.</b> Married <b>2.</b> Single                                                                                                                              |
| 6 | Smoking status: <b>1.</b> Yes <b>2.</b> No, I have never used <b>3.</b> I was using it, I quit                                                                                  |
| 7 | If you smoke, how long have been smoking? ....<br><br>How many cigarettes do you smoke per day? ....                                                                            |
| 8 | If you have smoked and quit before, when did you quit?<br><br>How many cigarettes did you smoke per day?<br><br>How long have you smoked?                                       |
| 9 | Do you have a diagnosed underlying disease? <b>1.</b> Yes <b>2.</b> No<br><br>If your answer is yes, please tick the appropriate one below (you can tick more than one option). |

|    |                                                                                                                                                                                                                                                                                                                                                                                                                                                                                              |
|----|----------------------------------------------------------------------------------------------------------------------------------------------------------------------------------------------------------------------------------------------------------------------------------------------------------------------------------------------------------------------------------------------------------------------------------------------------------------------------------------------|
|    | <input type="checkbox"/> Diabetes <input type="checkbox"/> Hypertension <input type="checkbox"/> Chronic heart disease <input type="checkbox"/> Chronic respiratory disease<br><input type="checkbox"/> Chronic kidney disease <input type="checkbox"/> Chronic liver disease <input type="checkbox"/> Chronic neurological disease <input type="checkbox"/> Cancer<br><input type="checkbox"/> Organ or bone marrow transplantation. <input type="checkbox"/> Other (please specify): ..... |
| 10 | When did you get COVID-19 disease?                                                                                                                                                                                                                                                                                                                                                                                                                                                           |
| 11 | Has any family member other than you had COVID-19 in the same home? <b>1. Yes</b> <b>2. No</b>                                                                                                                                                                                                                                                                                                                                                                                               |
| 12 | Have you been vaccinated against COVID-19? <b>1. Yes</b> <b>2. No</b>                                                                                                                                                                                                                                                                                                                                                                                                                        |
| 13 | If you have been vaccinated, which COVID-19 vaccine have you been vaccinated with?<br><b>1. Sinovac   2. AstraZeneca   3. Pfizer   4. Johnson and Johnson   5. Moderna</b>                                                                                                                                                                                                                                                                                                                   |
| 14 | If you have been vaccinated, have you been vaccinated before or after you had the disease?<br><b>1. Before   2. After</b>                                                                                                                                                                                                                                                                                                                                                                    |
| 15 | If you were vaccinated, when were you vaccinated?                                                                                                                                                                                                                                                                                                                                                                                                                                            |

## Section II. Information about the COVID-19 disease

|    |                                                                                                                                                                                                                                                                                                                                                                                                     |
|----|-----------------------------------------------------------------------------------------------------------------------------------------------------------------------------------------------------------------------------------------------------------------------------------------------------------------------------------------------------------------------------------------------------|
| 16 | What were the first symptoms that bothered you the day you tested positive for COVID-19?<br><b>1. No symptom 2. Fever 3. Loss of appetite 4. Chest pain 5. Cough 6. Diarrhea 7. Dyspnea 8. Sputum production. 9. Fatigue 10. Headache 11. Haemoptysis 12. Muscle pain 13. Joint pain 14. Nausea 15. Sore throat 16. Abdominal pain 17. Runny nose 18. Loss of taste 19. Loss of smell</b><br>Other: |
| 17 | Have you been hospitalized for treatment? <b>1. Yes</b> <b>2. No</b>                                                                                                                                                                                                                                                                                                                                |
| 18 | If you were hospitalized, how long were you in the hospital?                                                                                                                                                                                                                                                                                                                                        |
| 19 | Have you been hospitalized in the intensive care unit (ICU)? <b>1. Yes</b> <b>2. No</b>                                                                                                                                                                                                                                                                                                             |
| 20 | If you were admitted to the ICU, how long did you stay in the ICU?                                                                                                                                                                                                                                                                                                                                  |
| 21 | Was nasal oxygen therapy administered? <b>1. Yes</b> <b>2. No</b>                                                                                                                                                                                                                                                                                                                                   |
| 22 | Was non-invasive ventilation applied? <b>1. Yes</b> <b>2. No</b>                                                                                                                                                                                                                                                                                                                                    |

|    |                                                                         |
|----|-------------------------------------------------------------------------|
| 23 | Was invasive mechanical ventilation applied? <b>1. Yes</b> <b>2. No</b> |
| 24 | When were you discharged?                                               |

### Section III. Information on health status after discharge from COVID-19

|    |                                                                                                                                                                                                                                                                                                                                                                                                                                                   |
|----|---------------------------------------------------------------------------------------------------------------------------------------------------------------------------------------------------------------------------------------------------------------------------------------------------------------------------------------------------------------------------------------------------------------------------------------------------|
| 25 | After discharge, how do you feel compared to your situation before you contracted COVID-19?<br><br>1. Normal 2. Worsening in health status (due to weakness, feeling tired) 3. Improvement in health status                                                                                                                                                                                                                                       |
| 26 | Which of the following(s) increased in frequency after you were discharged?<br><br><b>1. Memory problems 2. Dizziness 3. Attention disorder 4. Chest pain 5. Palpitation 6. Diarrhea 7. Abdominal pain 8. Nausea 9. Vomiting 10. Fatigue 11. Dyspnea 12. Cough 13. Sore throat 14. Muscle pain 15. Joint pain 16. Fever 17. Headache 18. Nasal obstruction 19. Exuviation 20. Hair loss 21. Loss of appetite 22. Sleep disorder</b><br><br>Other: |
| 27 | Which of the following have you experienced in the last week?<br><br><b>1. Memory problems 2. Dizziness 3. Attention disorder 4. Chest pain 5. Palpitation 6. Diarrhea 7. Abdominal pain 8. Nausea 9. Vomiting 10. Fatigue 11. Dyspnea 12. Cough 13. Sore throat 14. Muscle pain 15. Joint pain 16. Fever 17. Headache 18. Nasal obstruction 19. Exuviation 20. Hair loss 21. Loss of appetite 22. Sleep disorder</b><br><br>Other:               |
| 28 | What kind of change did you detect in your sense of taste after discharge?<br><br><b>1. No change      2. Better than before illness      3. Worse than before the illness</b>                                                                                                                                                                                                                                                                    |
| 29 | What kind of change did you detect in your sense of smell after discharge?<br><br><b>1. No change      2. Better than before illness      3. Worse than before the illness</b>                                                                                                                                                                                                                                                                    |

*Our survey is over. Thanks for your participation and contribution*
